# Supplementary material for: Shift in Tissue-Specific Immune Niches and CD137 Expression in Tuberculoma of Pembrolizumab-Treated Nasopharyngeal Carcinoma Patients
Source: MDPI journal article supplement (doi:10.3390/cancers16020268), 2024-01-08
Supplement: s1 [file s1]

## SUPPLEMENTARY FIGURES

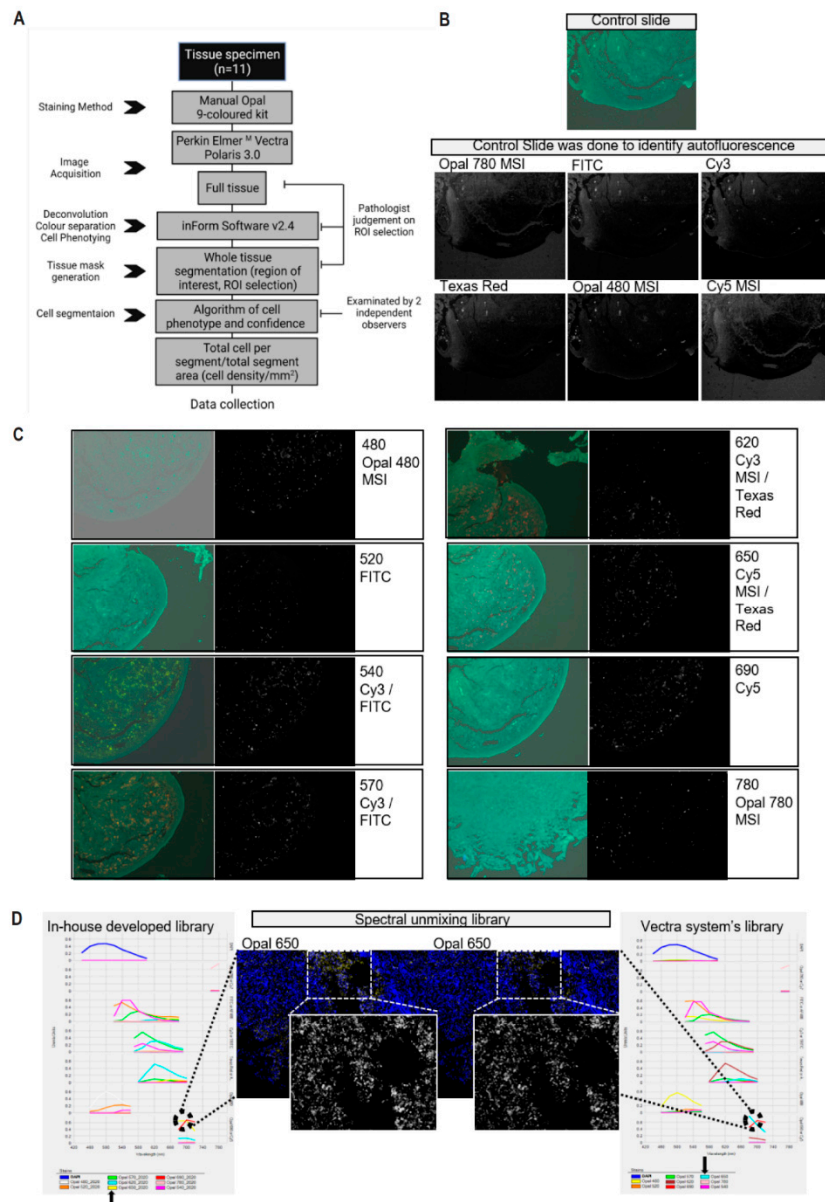

**Supplementary Figure S1.** Multiplex IHC quality control and validation. **(A)** Multiplex IHC experimental overview and example of pipeline for quantification of immune subsets in tissue biopsies. **(B)** The images display the removed autofluorescence for acquiring multispectral (MSI) regions of interest in control slide. **(C)** Raw acquired images from for spectral decomposition (“unmixing”) with corresponding Opal™ dyes in control slide. **(D)** Example of in-house developed library yields very accurate unmixing results. Fluorescence image of NPC control tissue stained against PD-L1 with Opal 650 dye with Vectra systems’ library (right). Emission spectra of purer Opal 650 (yellow line: in-house library) compared to the less pure Opal 650 (turquoise: Vectra’s library). The established in-house spectral library was used for acquisition and analysis of future datasets.

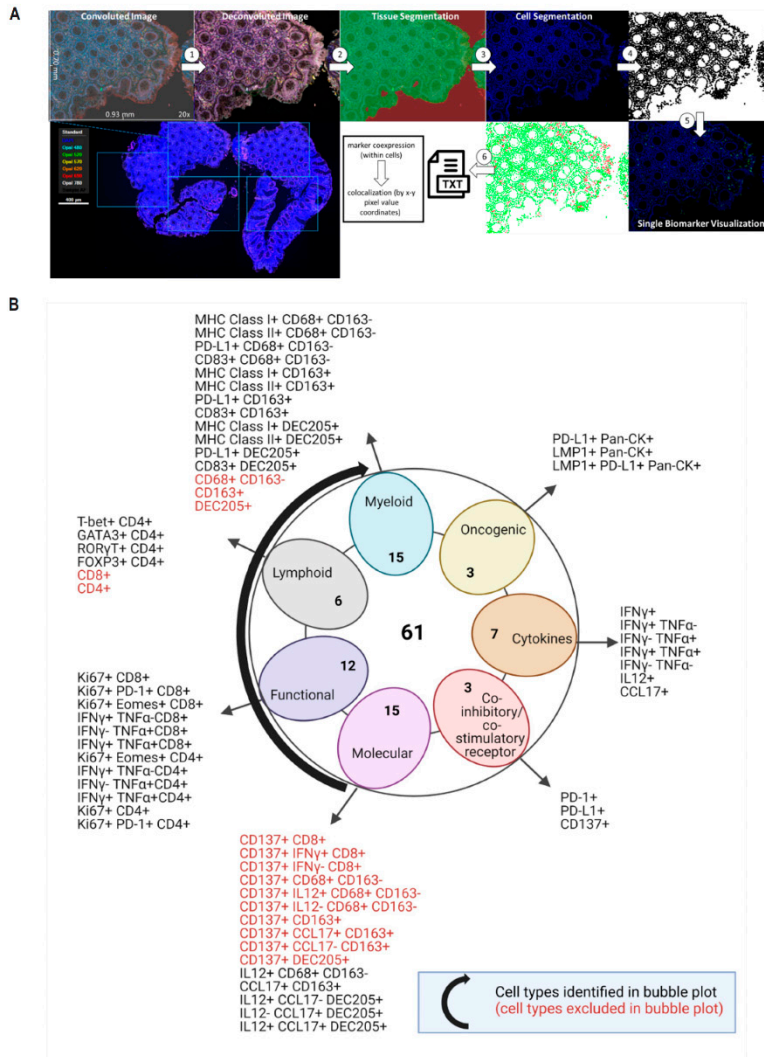

**Supplementary Figure S2. Multiplex IHC to visualize cell density. (A)** Workflow of experimental multiplex IHC study. **(B)** 61-biomarker combinations [ 48 combinations identified for immune subsets (identified from myeloid, lymphoid, functional and molecular panels), 3 combinations identified for cancer types (identified from oncogenic panel); 7 combination identified for cytokine patterns and 3 identified for co-inhibitory/co-stimulatory receptor)] were used to map relatively cell composition and states across clinical specimen. Black arrow represented 33 immune cell types applied in the bubble plots of Fig. 6B. Red highlighted cell types were excluded from the bubble plots (including 5 pan-immune cell markers: CD4<sup>+</sup>, CD8<sup>+</sup>, CD68<sup>+</sup>CD163<sup>-</sup>, CD163<sup>+</sup> and DEC205<sup>+</sup>, which were chosen to exclude due to high proportion these major classes of immune cells compared to the remaining analyzed cells; and 10 CD137-expressing cells, which were used for the refinement panels)



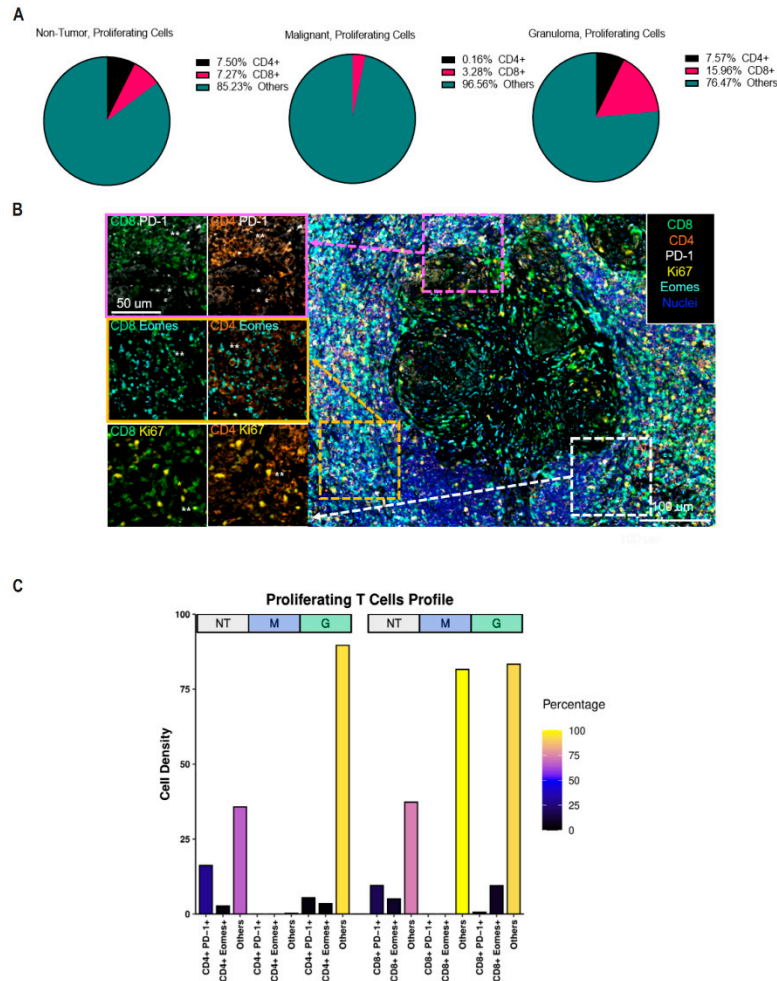

**Supplementary Figure S4.** Multiplex IHC to visualize T cell activation. **(A)** Pie chart showing the proportion of proliferating CD4<sup>+</sup> and CD8<sup>+</sup> T cells in non-tumor, tumor and granuloma tissues. **(B)** Representative images from granulomatous tissue. Biomarkers and colors are shown. Colored boxes show the magnified area. **(C)** Bar plot showing the cell density (cell density/mm<sup>2</sup>) of different T-cell subsets in cluster 1 (NT), cluster 2 (M) and cluster 3 (G) tissue types. The color gradient represents the percentage of each T cell subpopulations within total CD4<sup>+</sup> T cells or total CD8<sup>+</sup> T cells.

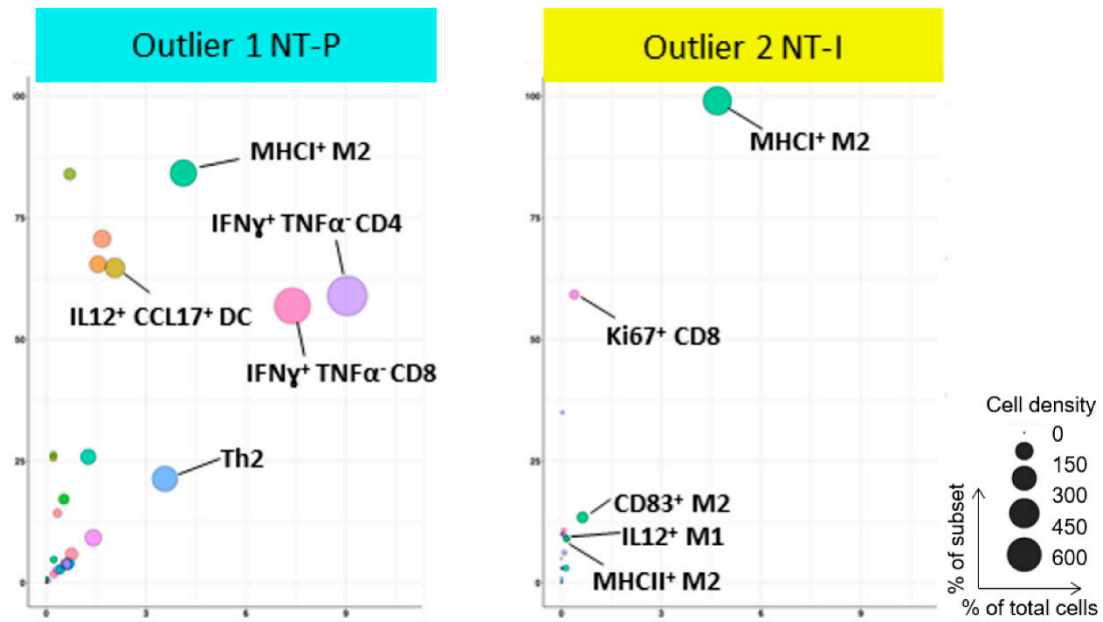

**Supplementary Figure S5.** Heterogeneous structured immune microenvironments across two different non-tumor tissues. Bubble-chart plots summarized frequencies of all cell types in outlier 1 (NT-P) and outlier 2 (NT-I). The bubble size was proportional to the cell density. X-axis represents the percentage of indicated cellular subset in total cells, and y-axis indicates the cellular subset in myeloid-/lymphoid lineage. All the different cellular subsets are color coded.

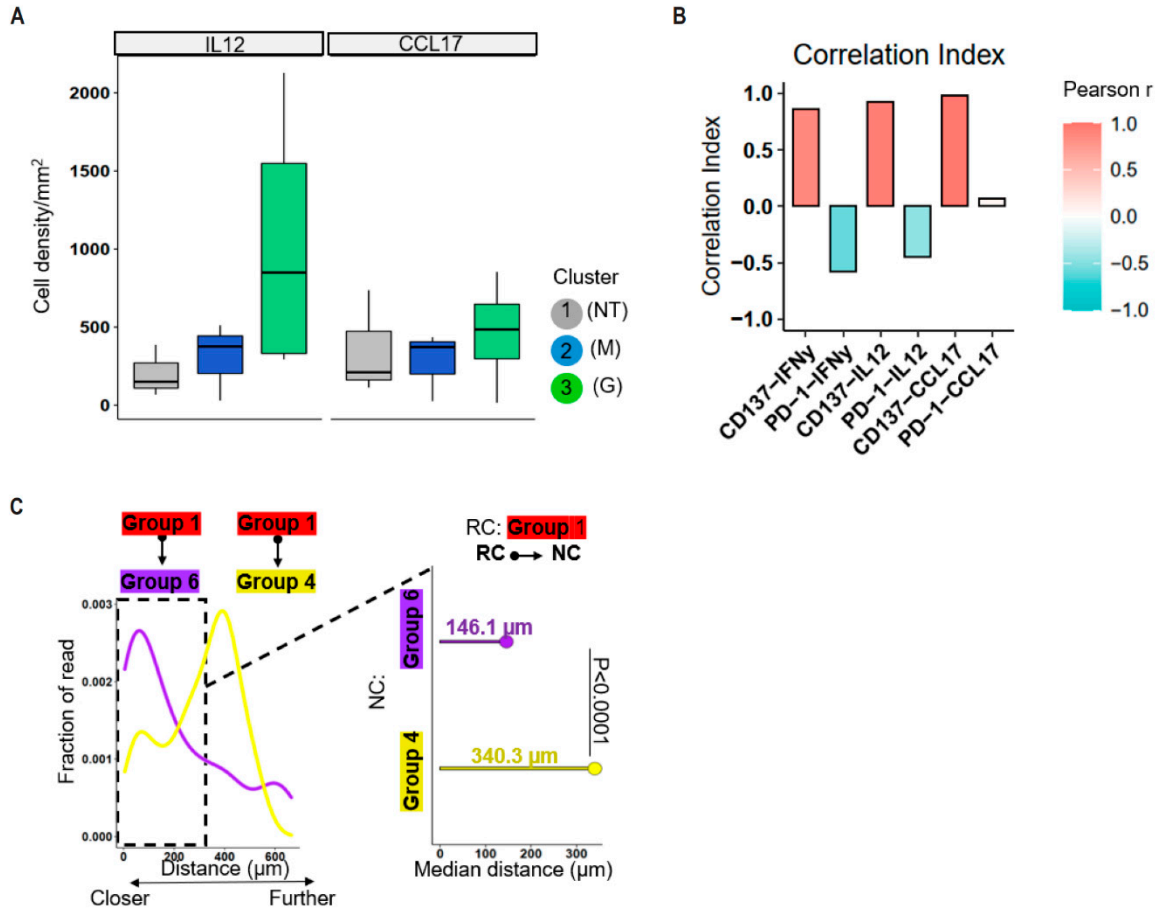

**Supplementary Figure S6.** Cellular interconnectivity in granuloma tissue. **(A)** Boxplots displaying the total cell density of IL12 and CCL17 and PD-1 expression in cluster 1 (NT), cluster 2 (M), cluster 3 (G) tissue types. **(B)** Pearson correlation for CD137, PD1, IFN $\gamma$ , IL12 and CCL17 for all cells across within granuloma tissue. Color indicates direction of change, that is, red=gained association, green=lost association. **(C)** Histograms show distances in  $\mu$ m. Histograms show all (left) or given distance (right) in  $\mu$ m of between reference cell (RC) type group and nearest cell (NC) type group within granuloma. Solid dot represents RC (Group 1 cell type in green: CD137+IFN $\gamma$ -CD8) and arrow line represent NC (Group 4 cell types in purple: CD137+IL12+M1 or group 6 cell types in yellow: CD137+IL12+M2). The dashed rectangle highlights the most differential distribution between respective RC to NC. Data information: In the boxplots in (A), the centerline indicates the median, while the upper and lower lines represent the 75th and 25th percentiles, respectively. In (C), median value of the nearest distances (range from 0 to 300  $\mu$ m) indicated in the plot. P values were calculated with a Wilcoxon test.

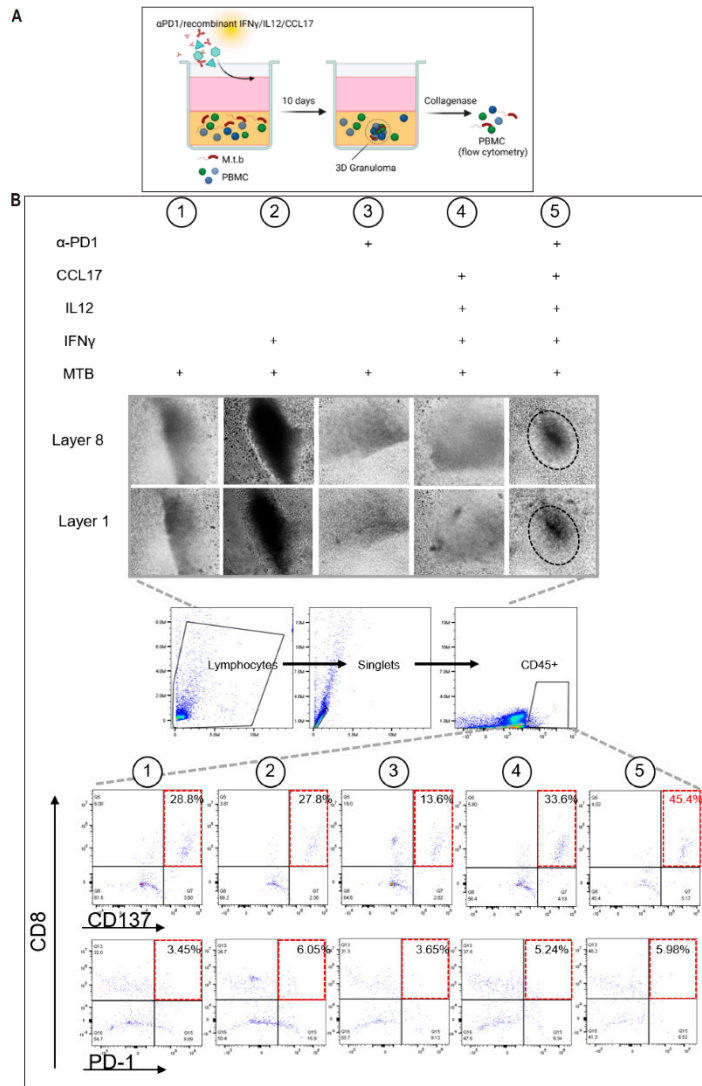

**Supplementary Figure S7.** Generating three-dimensional human granulomas *in vitro* to study cytokine in tuberculosis. **(A)** Schematic representation of the 3D *in vitro* granuloma model. Five different treatment conditions in the presence or absence of recombinant MTB antigens ESAT-6/CFP-10, recombinant cytokine proteins (IFN $\gamma$ /IL12/CCL17) or KEYTRUDA® (pembrolizumab, anti-PD1 inhibitor;  $\alpha$ PD1) are cultured with PBMCs and embedded in an extracellular matrix. Formation of granuloma-like structures can be observed after 10 days. PBMCs can be released from the extracellular matrix by collagenase digestion for subsequent flow cytometric analysis. **(B)** *In vitro* granuloma-like structures are formed on day 10 by the combination of different treatment (numbered), including the addition of recombinant MTB antigens and/or recombinant IFN $\gamma$  and/or recombinant IL12 and/or recombinant CCL17 and/or anti-PD1 inhibitor (indicated as “+” and “-” in the legends). Images of the granulomas at day 10 revealed multilayered structures containing approximately 8 cell layers. No formation of granulomas was observed in all other treatment conditions. Gating strategy to identify the principle CD45<sup>+</sup> immune cells. CD45 gated for CD8 T cell. CD8 T cells were then separated into two subsets (CD137<sup>+</sup> CD8 T cells and PD1<sup>+</sup> CD8 T cells) based on CD137 and PD1 labeling.

## **SUPPLEMENTARY TABLES**

**Supplementary Table S1 Antibody List**

| <b>Antibody Name</b> | <b>Company</b>          | <b>Reference Number</b> |
|----------------------|-------------------------|-------------------------|
| CCL17                | Abcam                   | Ab182793                |
| CD4                  | DAKO                    | M7310                   |
| CD8                  | DAKO                    | IS623                   |
| CD68                 | DAKO                    | M0814                   |
| CD83                 | ThermoFisher Scientific | PA5-80448               |
| CD137                | Invitrogen              | MA5-13739               |
| CD163                | ThermoFisher Scientific | MS-1103-S0              |
| DEC-205              | LSBio                   | B2669                   |
| Eomes                | Millipore               | AB2283                  |
| FOXP3                | Abcam                   | Ab20034                 |
| GATA3                | BD Pharmingen           | 558686                  |
| IFN                  | Abcam                   | Ab9657                  |
| IL12                 | Abcam                   | Ab131039                |
| Ki67                 | Abcam                   | Ab15580                 |
| LMP1                 | Enzo                    | ALX-810-231-R500        |
| MHC Class I          | Abcam                   | Ab70328                 |
| MHC Class II         | Novus                   | SPM288                  |
| MTB                  | Abcam                   | Ab905                   |
| Pan-CK               | DAKO                    | M0821                   |
| PD-1                 | Abcam                   | Ab52587                 |
| PD-L1                | DAKO                    | M3653                   |
| ROR                  | Millipore               | MABF81                  |
| T-bet                | Abcam                   | Ab91109                 |
| TNF                  | Abcam                   | Ab1793                  |

**Supplementary Table S2 Lineage and Identification Table**

| <b>T helper cell</b>                                                      |                                                         |
|---------------------------------------------------------------------------|---------------------------------------------------------|
| CD4 <sup>+</sup>                                                          | T helper cells                                          |
| Ki67 <sup>+</sup> CD4 <sup>+</sup>                                        | Proliferating T helper cells                            |
| Ki67 <sup>+</sup> PD-1 <sup>+</sup> CD4 <sup>+</sup>                      | Proliferating Suppressive T helper cells                |
| T-bet <sup>+</sup> CD4 <sup>+</sup>                                       | Th1                                                     |
| GATA3 <sup>+</sup> CD4 <sup>+</sup>                                       | Th2                                                     |
| ROR T <sup>+</sup> CD4 <sup>+</sup>                                       | Th17                                                    |
| FOXP3 <sup>+</sup> CD4 <sup>+</sup>                                       | Treg                                                    |
| Ki67 <sup>+</sup> Eomes <sup>+</sup> CD4 <sup>+</sup>                     | Proliferating Eomes expressing T helper cells           |
| IFN <sup>+</sup> TNF CD4 <sup>+</sup>                                     | IFN releasing T helper cells                            |
| IFN <sup>-</sup> TNF CD4 <sup>+</sup>                                     | TNF releasing cells                                     |
| IFN <sup>+</sup> TNF CD4 <sup>+</sup>                                     | IFN and TNF releasing T helper cells                    |
| <b>CD8 positive T cells</b>                                               |                                                         |
| CD8 <sup>+</sup>                                                          | CD8 positive T cells                                    |
| Ki67 <sup>+</sup> CD8 <sup>+</sup>                                        | Proliferating CD8 positive T cells                      |
| Ki67 <sup>+</sup> PD-1 <sup>+</sup> CD8 <sup>+</sup>                      | Proliferating Suppressive CD8 positive T cells          |
| Ki67 <sup>+</sup> Eomes <sup>+</sup> CD8 <sup>+</sup>                     | Proliferating CD8 positive memory T cells               |
| IFN <sup>+</sup> TNF CD8 <sup>+</sup>                                     | IFN releasing CD8 positive T cells (non-TNF releasing)  |
| IFN <sup>-</sup> TNF CD8 <sup>+</sup>                                     | TNF releasing CD8 positive T cells (non- IFN releasing) |
| IFN <sup>+</sup> TNF CD8 <sup>+</sup>                                     | IFN and TNF releasing CD8 positive T cells              |
| CD137 <sup>+</sup> CD8 <sup>+</sup>                                       | CD137 positive CD8 positive T cells                     |
| CD137 <sup>+</sup> IFN <sup>+</sup> CD8 <sup>+</sup>                      | CD137 positive IFN releasing CD8 positive T cells       |
| CD137 <sup>+</sup> IFN <sup>-</sup> CD8 <sup>+</sup>                      | CD137 positive non-IFN releasing CD8 positive T cells   |
| <b>Macrophage-M1</b>                                                      |                                                         |
| CD68 <sup>+</sup> CD163 <sup>-</sup>                                      | M1 cells                                                |
| MHC Class I <sup>+</sup> CD68 <sup>+</sup> CD163 <sup>-</sup>             | Antigen presenting M1 cells                             |
| MHC Class II <sup>+</sup> CD68 <sup>+</sup> CD163 <sup>-</sup>            | Antigen presenting M1 cells                             |
| PD-L1 <sup>+</sup> CD68 <sup>+</sup> CD163 <sup>-</sup>                   | Immune suppressive M1 cells                             |
| CD83 <sup>+</sup> CD68 <sup>+</sup> CD163 <sup>-</sup>                    | Activated M1 cells                                      |
| IL12 <sup>+</sup> CD68 <sup>+</sup> CD163 <sup>-</sup>                    | IL12 releasing M1 cells                                 |
| CD137 <sup>+</sup> CD68 <sup>+</sup> CD163 <sup>-</sup>                   | CD137 positive M1 cells                                 |
| CD137 <sup>+</sup> IL12 <sup>+</sup> CD68 <sup>+</sup> CD163 <sup>-</sup> | CD137 positive IL12 releasing M1 cells                  |
| CD137 <sup>+</sup> IL12 <sup>-</sup> CD68 <sup>+</sup> CD163 <sup>-</sup> | CD137 positive non-IL12 releasing M1 cells              |
| <b>Macrophage-M2</b>                                                      |                                                         |
| CD163 <sup>+</sup>                                                        | M2 cells                                                |
| MHC Class I <sup>+</sup> CD163 <sup>+</sup>                               | Antigen presenting M2 cells                             |
| MHC Class II <sup>+</sup> CD163 <sup>+</sup>                              | Antigen presenting M2 cells                             |
| PD-L1 <sup>+</sup> CD163 <sup>+</sup>                                     | Suppressive M2 cells                                    |
| CD83 <sup>+</sup> CD163 <sup>+</sup>                                      | Activated M2 cells                                      |
| CCL17 <sup>+</sup> CD163 <sup>+</sup>                                     | CCL17 releasing M2 cells                                |
| CD137 <sup>+</sup> CD163 <sup>+</sup>                                     | CD137 positive M2 cells                                 |
| CD137 <sup>+</sup> CCL17 <sup>+</sup> CD163 <sup>+</sup>                  | CD137 positive CCL17 releasing M2 cells                 |
| CD137 <sup>+</sup> CCL17 <sup>-</sup> CD163 <sup>+</sup>                  | CD137 positive non-CCL17 releasing M2 cells             |
| <b>Dendritic cells</b>                                                    |                                                         |
| DEC205 <sup>+</sup>                                                       | Dendritic cells                                         |
| MHC Class I <sup>+</sup> DEC205 <sup>+</sup>                              | Antigen presenting dendritic cells                      |

|                                                          |                                                                    |
|----------------------------------------------------------|--------------------------------------------------------------------|
| MHC Class II <sup>+</sup> DEC205 <sup>+</sup>            | Antigen presenting dendritic cells                                 |
| PD-L1 <sup>+</sup> DEC205 <sup>+</sup>                   | Immune suppressive dendritic cells                                 |
| CD83 <sup>+</sup> DEC205 <sup>+</sup>                    | Activated dendritic cells                                          |
| IL12 <sup>+</sup> CCL17 <sup>-</sup> DEC205 <sup>+</sup> | IL12 releasing dendritic cells                                     |
| IL12 <sup>-</sup> CCL17 <sup>+</sup> DEC205 <sup>+</sup> | CCL17 releasing dendritic cells                                    |
| IL12 <sup>+</sup> CCL17 <sup>+</sup> DEC205 <sup>+</sup> | IL12 and CCL17 releasing dendritic cells                           |
| CD137 <sup>+</sup> DEC205 <sup>+</sup>                   | CD137 positive dendritic cells                                     |
| <b>Cancer cells</b>                                      |                                                                    |
| PD-L1 <sup>+</sup> Pan-CK <sup>+</sup>                   | Immune suppressive cancer cells                                    |
| LMP1 <sup>+</sup> Pan-CK <sup>+</sup>                    | EBV infected cancer cells                                          |
| LMP1 <sup>+</sup> PD-L1 <sup>+</sup> Pan-CK <sup>+</sup> | Immune suppressive EBV infected cancer cells                       |
| <b>Cytokines</b>                                         |                                                                    |
| IFN <sup>+</sup>                                         | IFN <sup>+</sup> releasing cells                                   |
| IFN <sup>+</sup> TNF                                     | IFN <sup>+</sup> releasing cells (non-TNF <sup>+</sup> releasing)  |
| IFN <sup>-</sup> TNF                                     | TNF <sup>+</sup> releasing cells (non- IFN <sup>+</sup> releasing) |
| IFN <sup>+</sup> TNF                                     | IFN <sup>+</sup> and TNF <sup>+</sup> releasing cells              |
| IFN <sup>-</sup> TNF                                     | Non-IFN <sup>+</sup> and non-TNF <sup>+</sup> releasing cells      |
| IL12 <sup>+</sup>                                        | IL1 <sup>+</sup> releasing cells                                   |
| CCL17 <sup>+</sup>                                       | CCL17 releasing cells                                              |
| <b>Co-inhibitory/co-stimulatory receptor</b>             |                                                                    |
| PD-1 <sup>+</sup>                                        | PD-1 positive cells                                                |
| PD-L1 <sup>+</sup>                                       | PD-L1 positive cells                                               |
| CD137 <sup>+</sup>                                       | CD137 positive cells                                               |

**Supplementary Table S3 Staining Sequence for Oncogenic Panel**

| <b>Antibody</b>                                                                                                                                           | <b>Dilution</b> | <b>Protein Block Time</b> | <b>Antigen Retrieval Buffer</b> | <b>Opal Dye</b> | <b>Incubation Time</b>      |
|-----------------------------------------------------------------------------------------------------------------------------------------------------------|-----------------|---------------------------|---------------------------------|-----------------|-----------------------------|
| LMP1                                                                                                                                                      | 1:100           | 10 minutes                | Citric Acid                     | Opal 650        | 4°C Overnight               |
| PD-L1                                                                                                                                                     | 1:50            | 10 minutes                | Citric Acid                     | Opal 690        | Room Temperature for 1 hour |
| PD-1                                                                                                                                                      | 1:50            | 10 minutes                | Citric Acid                     | Opal 480        | 4°C Overnight               |
| IFN                                                                                                                                                       | 1:1000          | 10 minutes                | Citric Acid                     | Opal 620        | 4°C Overnight               |
| Pan-CK                                                                                                                                                    | 1:100           | 10 minutes                | Citric Acid                     | Opal 540        | Room Temperature for 1 hour |
| Number of biomarkers: 5                                                                                                                                   |                 |                           |                                 |                 |                             |
| Number of combinations: 6                                                                                                                                 |                 |                           |                                 |                 |                             |
| Cell types: [3] PD-L1 <sup>+</sup> Pan-CK <sup>+</sup> , LMP1 <sup>+</sup> Pan-CK <sup>+</sup> , LMP1 <sup>+</sup> PD-L1 <sup>+</sup> Pan-CK <sup>+</sup> |                 |                           |                                 |                 |                             |
| Cytokine releasing cells: [1] IFN <sup>+</sup>                                                                                                            |                 |                           |                                 |                 |                             |
| Co-inhibitory/co-stimulatory receptor: [2] PD-1 <sup>+</sup> , PD-L1 <sup>+</sup>                                                                         |                 |                           |                                 |                 |                             |

**Supplementary Table S4 Sample Information and Corresponding Grouping**

| <b>Patient</b> | <b>Lab Biopsy Number</b> | <b>Biopsy Description</b>                                                                   | <b>Sample Grouping</b>          |
|----------------|--------------------------|---------------------------------------------------------------------------------------------|---------------------------------|
| I              | 674                      | Initial NPC biopsy                                                                          | Cluster 2 (M)                   |
| I              | 824                      | Ileum biopsy with granuloma inflammation                                                    | Cluster 3(G)                    |
| I              | 307                      | Nasopharyngeal biopsy before resuming pembrolizumab after completion of anti-TB medication. | Outlier 2 (NT-I)                |
| I              | 309                      | Nasopharyngeal biopsy after resuming pembrolizumab after completion of anti-TB medication.  | Cluster 1 (NT)                  |
| I              | 296A                     | Terminal ileum biopsy 9 months after the completion of anti-TB medication                   | Cluster 1 (NT)                  |
| I              | 296B                     | Terminal cecum biopsy 9 months after the completion of anti-TB medication                   | Cluster 1 (NT)                  |
| II             | 208                      | Nasopharyngeal baseline sample                                                              | Outlier 1 (NT-P)                |
| II             | 174                      | Lung biopsy with undifferentiated NPC                                                       | Cluster 2 (M)                   |
| II             | 629A                     | Liver biopsy with undifferentiated NPC and granuloma inflammation                           | Cluster 2 (M) and Cluster 3 (G) |
| II             | 629B                     | Falciform ligament biopsy with granuloma inflammation                                       | Cluster 3 (G)                   |
| II             | 629C                     | Duodenal lymph node with granuloma inflammations                                            | Cluster 3 (G)                   |

**Supplementary Table S5 Staining Sequence for Myeloid Panel**

| <b>Antibody</b>                                                                                                                                                                                                                                                                                                                                                                                                                                                                                                                                                                                                                                                                                                  | <b>Dilution</b> | <b>Protein Block Time</b> | <b>Antigen Retrieval Buffer</b> | <b>Opal Dye</b> | <b>Incubation Time</b>      |
|------------------------------------------------------------------------------------------------------------------------------------------------------------------------------------------------------------------------------------------------------------------------------------------------------------------------------------------------------------------------------------------------------------------------------------------------------------------------------------------------------------------------------------------------------------------------------------------------------------------------------------------------------------------------------------------------------------------|-----------------|---------------------------|---------------------------------|-----------------|-----------------------------|
| DEC-205                                                                                                                                                                                                                                                                                                                                                                                                                                                                                                                                                                                                                                                                                                          | 1:150           | 10 minutes                | Citric Acid                     | Opal 570        | 4°C Overnight               |
| PD-L1                                                                                                                                                                                                                                                                                                                                                                                                                                                                                                                                                                                                                                                                                                            | 1:50            | 10 minutes                | Citric Acid                     | Opal 650        | Room Temperature for 1 hour |
| MHC Class I                                                                                                                                                                                                                                                                                                                                                                                                                                                                                                                                                                                                                                                                                                      | 1:100           | 10 minutes                | Tris-EDTA                       | Opal 480        | Room Temperature for 1 hour |
| CD163                                                                                                                                                                                                                                                                                                                                                                                                                                                                                                                                                                                                                                                                                                            | 1:50            | 30 minutes                | Citric Acid                     | Opal 690        | 4°C Overnight               |
| MHC Class II                                                                                                                                                                                                                                                                                                                                                                                                                                                                                                                                                                                                                                                                                                     | 1:400           | 30 minutes                | Citric Acid                     | Opal 620        | 4°C Overnight               |
| CD83                                                                                                                                                                                                                                                                                                                                                                                                                                                                                                                                                                                                                                                                                                             | 1:1000          | 30 minutes                | Citric Acid                     | Opal 540        | Room Temperature for 1 hour |
| CD68                                                                                                                                                                                                                                                                                                                                                                                                                                                                                                                                                                                                                                                                                                             | 1:100           | 30 minutes                | Citric Acid                     | Opal 780        | 4°C Overnight               |
| Number of biomarkers: 7                                                                                                                                                                                                                                                                                                                                                                                                                                                                                                                                                                                                                                                                                          |                 |                           |                                 |                 |                             |
| Number of combinations: 15                                                                                                                                                                                                                                                                                                                                                                                                                                                                                                                                                                                                                                                                                       |                 |                           |                                 |                 |                             |
| Cell types: [15] DEC205 <sup>+</sup> , MHC Class I <sup>+</sup> DEC205 <sup>+</sup> , MHC Class II <sup>+</sup> DEC205 <sup>+</sup> , PD-L1 <sup>+</sup> DEC205 <sup>+</sup> , CD83 <sup>+</sup> DEC205 <sup>+</sup> , CD68 <sup>+</sup> CD163 <sup>-</sup> , MHC Class I <sup>+</sup> CD68 <sup>+</sup> CD163 <sup>-</sup> , MHC Class II <sup>+</sup> CD68 <sup>+</sup> CD163 <sup>-</sup> , PD-L1 <sup>+</sup> CD68 <sup>+</sup> CD163 <sup>-</sup> , CD83 <sup>+</sup> CD68 <sup>+</sup> CD163 <sup>-</sup> , CD163 <sup>+</sup> , MHC Class I <sup>+</sup> CD163 <sup>+</sup> , MHC Class II <sup>+</sup> CD163 <sup>+</sup> , PD-L1 <sup>+</sup> CD163 <sup>+</sup> , CD83 <sup>+</sup> CD163 <sup>+</sup> |                 |                           |                                 |                 |                             |

**Supplementary Table S6 Staining Sequence for Lymphoid Panel**

| <b>Antibody</b>                                                                                                                                                                                                                   | <b>Dilution</b> | <b>Protein Block Time</b> | <b>Antigen Retrieval Buffer</b> | <b>Opal Dye</b> | <b>Incubation Time</b>      |
|-----------------------------------------------------------------------------------------------------------------------------------------------------------------------------------------------------------------------------------|-----------------|---------------------------|---------------------------------|-----------------|-----------------------------|
| CD4                                                                                                                                                                                                                               | 1:50            | 1 hour                    | Tris-EDTA                       | Opal 520        | 4°C Overnight               |
| CD8                                                                                                                                                                                                                               | NA              | 10 minutes                | Tris-EDTA                       | Opal 570        | Room Temperature for 1 hour |
| ROR                                                                                                                                                                                                                               | 1:200           | 10 minutes                | Tris-EDTA                       | Opal 650        | Room Temperature for 1 hour |
| GATA3                                                                                                                                                                                                                             | 1:800           | 10 minutes                | Tris-EDTA                       | Opal 690        | Room Temperature for 1 hour |
| FOXP3                                                                                                                                                                                                                             | 1:100           | 10 minutes                | Tris-EDTA                       | Opal 620        | 4°C Overnight               |
| T-bet                                                                                                                                                                                                                             | 1:100           | 10 minutes                | Citric-Acid                     | Opal 540        | Room Temperature for 1 hour |
| Number of biomarkers: 6                                                                                                                                                                                                           |                 |                           |                                 |                 |                             |
| Number of combinations: 6                                                                                                                                                                                                         |                 |                           |                                 |                 |                             |
| Cell types: [6] CD4 <sup>+</sup> , T-bet <sup>+</sup> CD4 <sup>+</sup> (Th1), GATA3 <sup>+</sup> CD4 <sup>+</sup> (Th2), ROR T <sup>+</sup> CD4 <sup>+</sup> (Th17), FOXP3 <sup>+</sup> CD4 <sup>+</sup> (Treg), CD8 <sup>+</sup> |                 |                           |                                 |                 |                             |

**Supplementary Table S7 Staining Sequence for Functional Panel**

| <b>Antibody</b>                                                                                                                                                                                                                                                                                                                                                                                                                                                                                                                                                                                              | <b>Dilution</b> | <b>Protein Block Time</b> | <b>Antigen Retrieval Buffer</b> | <b>Opal Dye</b> | <b>Incubation Time</b>      |
|--------------------------------------------------------------------------------------------------------------------------------------------------------------------------------------------------------------------------------------------------------------------------------------------------------------------------------------------------------------------------------------------------------------------------------------------------------------------------------------------------------------------------------------------------------------------------------------------------------------|-----------------|---------------------------|---------------------------------|-----------------|-----------------------------|
| CD4                                                                                                                                                                                                                                                                                                                                                                                                                                                                                                                                                                                                          | 1:50            | 1 hour                    | Tris-EDTA                       | Opal 520        | 4°C Overnight               |
| CD8                                                                                                                                                                                                                                                                                                                                                                                                                                                                                                                                                                                                          | NA              | 10 minutes                | Tris-EDTA                       | Opal 570        | Room Temperature for 1 hour |
| Ki-67                                                                                                                                                                                                                                                                                                                                                                                                                                                                                                                                                                                                        | 1:200           | 10 minutes                | Citric Acid                     | Opal 650        | Room Temperature for 1 hour |
| PD-1                                                                                                                                                                                                                                                                                                                                                                                                                                                                                                                                                                                                         | 1:50            | 10 minutes                | Citric Acid                     | Opal 480        | 4°C Overnight               |
| Eomes                                                                                                                                                                                                                                                                                                                                                                                                                                                                                                                                                                                                        | 1:300           | 10 minutes                | Citric Acid                     | Opal 620        | Room Temperature for 1 hour |
| IFN                                                                                                                                                                                                                                                                                                                                                                                                                                                                                                                                                                                                          | 1:1000          | 10 minutes                | Citric Acid                     | Opal 690        | 4°C Overnight               |
| T-bet                                                                                                                                                                                                                                                                                                                                                                                                                                                                                                                                                                                                        | 1:100           | 10 minutes                | Citric Acid                     | Opal 540        | Room Temperature for 1 hour |
| TNF                                                                                                                                                                                                                                                                                                                                                                                                                                                                                                                                                                                                          | 1:100           | 10 minutes                | Citric Acid                     | Opal 780        | 4°C Overnight               |
| Number of biomarkers: 8                                                                                                                                                                                                                                                                                                                                                                                                                                                                                                                                                                                      |                 |                           |                                 |                 |                             |
| Number of combinations: 19                                                                                                                                                                                                                                                                                                                                                                                                                                                                                                                                                                                   |                 |                           |                                 |                 |                             |
| Cell types: [14] CD4 <sup>+</sup> , Ki67 <sup>+</sup> CD4 <sup>+</sup> , Ki67 <sup>+</sup> PD-1 <sup>+</sup> CD4 <sup>+</sup> , Ki67 <sup>+</sup> Eomes <sup>+</sup> CD4 <sup>+</sup> , IFN <sup>+</sup> TNF CD4 <sup>+</sup> , IFN <sup>-</sup> TNF CD4 <sup>+</sup> , IFN <sup>+</sup> TNF CD4 <sup>+</sup> , CD8 <sup>+</sup> , Ki67 <sup>+</sup> CD8 <sup>+</sup> , Ki67 <sup>+</sup> PD-1 <sup>+</sup> CD8 <sup>+</sup> , Ki67 <sup>+</sup> Eomes <sup>+</sup> CD8 <sup>+</sup> , IFN <sup>+</sup> TNF CD8 <sup>+</sup> , IFN <sup>-</sup> TNF CD8 <sup>+</sup> , IFN <sup>+</sup> TNF CD8 <sup>+</sup> |                 |                           |                                 |                 |                             |
| Cytokine releasing cells: [4] IFN <sup>+</sup> TNF IFN <sup>-</sup> TNF IFN <sup>+</sup> TNF IFN <sup>-</sup> TNF                                                                                                                                                                                                                                                                                                                                                                                                                                                                                            |                 |                           |                                 |                 |                             |
| Co-inhibitory/co-stimulatory receptor: [1] PD-1 <sup>+</sup>                                                                                                                                                                                                                                                                                                                                                                                                                                                                                                                                                 |                 |                           |                                 |                 |                             |

**Supplementary Table S8 Staining Sequence for Molecular Panel**

| <b>Antibody</b>                                                                                                                                                                                                                                                                                                                                                                                                                                                                                                                                                                                                                                                                                                                                                                                                                                                             | <b>Dilution</b> | <b>Protein Block Time</b> | <b>Antigen Retrieval Buffer</b> | <b>Opal Dye</b> | <b>Incubation Time</b>      |
|-----------------------------------------------------------------------------------------------------------------------------------------------------------------------------------------------------------------------------------------------------------------------------------------------------------------------------------------------------------------------------------------------------------------------------------------------------------------------------------------------------------------------------------------------------------------------------------------------------------------------------------------------------------------------------------------------------------------------------------------------------------------------------------------------------------------------------------------------------------------------------|-----------------|---------------------------|---------------------------------|-----------------|-----------------------------|
| CD137                                                                                                                                                                                                                                                                                                                                                                                                                                                                                                                                                                                                                                                                                                                                                                                                                                                                       | 1:50            | 10 minutes                | Citric Acid                     | Opal 620        | 4°C Overnight               |
| CD8                                                                                                                                                                                                                                                                                                                                                                                                                                                                                                                                                                                                                                                                                                                                                                                                                                                                         | NA              | 10 minutes                | Tris-EDTA                       | Opal 520        | Room Temperature for 1 hour |
| DEC205                                                                                                                                                                                                                                                                                                                                                                                                                                                                                                                                                                                                                                                                                                                                                                                                                                                                      | 1:150           | 10 minutes                | Citric Acid                     | Opal 570        | 4°C Overnight               |
| IL12                                                                                                                                                                                                                                                                                                                                                                                                                                                                                                                                                                                                                                                                                                                                                                                                                                                                        | 1:250           | 10 minutes                | Citric Acid                     | Opal 540        | Room Temperature for 1 hour |
| CD163                                                                                                                                                                                                                                                                                                                                                                                                                                                                                                                                                                                                                                                                                                                                                                                                                                                                       | 1:50            | 30 minutes                | Citric Acid                     | Opal 650        | 4°C Overnight               |
| IFN                                                                                                                                                                                                                                                                                                                                                                                                                                                                                                                                                                                                                                                                                                                                                                                                                                                                         | 1:1000          | 10 minutes                | Citric Acid                     | Opal 690        | Room Temperature for 1 hour |
| CCL17                                                                                                                                                                                                                                                                                                                                                                                                                                                                                                                                                                                                                                                                                                                                                                                                                                                                       | 1:50            | 30 minutes                | Citric Acid                     | Opal 480        | 4°C Overnight               |
| CD68                                                                                                                                                                                                                                                                                                                                                                                                                                                                                                                                                                                                                                                                                                                                                                                                                                                                        | 1:100           | 30 minutes                | Citric Acid                     | Opal 780        | 4°C Overnight               |
| Number of biomarkers: 8                                                                                                                                                                                                                                                                                                                                                                                                                                                                                                                                                                                                                                                                                                                                                                                                                                                     |                 |                           |                                 |                 |                             |
| Number of combinations: 18                                                                                                                                                                                                                                                                                                                                                                                                                                                                                                                                                                                                                                                                                                                                                                                                                                                  |                 |                           |                                 |                 |                             |
| Cell types: [15] IL12 <sup>+</sup> CCL17 <sup>-</sup> DEC205 <sup>+</sup> , IL12 <sup>-</sup> CCL17 <sup>+</sup> DEC205 <sup>+</sup> , IL12 <sup>+</sup> CCL17 <sup>+</sup> DEC205 <sup>+</sup> , CD137 <sup>+</sup> DEC205 <sup>+</sup> , IL12 <sup>+</sup> CD68 <sup>+</sup> CD163 <sup>+</sup> , CD137 <sup>+</sup> CD68 <sup>+</sup> CD163 <sup>+</sup> , CD137 <sup>+</sup> IL12 <sup>-</sup> CD68 <sup>+</sup> CD163 <sup>+</sup> , CD137 <sup>+</sup> IL12 <sup>+</sup> CD68 <sup>+</sup> CD163 <sup>+</sup> , CCL17 <sup>+</sup> CD163 <sup>+</sup> , CD137 <sup>+</sup> CD163 <sup>+</sup> , CD137 <sup>+</sup> CCL17 <sup>-</sup> CD163 <sup>+</sup> ,CD137 <sup>+</sup> CCL17 <sup>+</sup> CD163 <sup>+</sup> , CD137 <sup>+</sup> CD8 <sup>+</sup> , CD137 <sup>+</sup> IFN <sup>-</sup> CD8 <sup>+</sup> ,CD137 <sup>+</sup> IFN <sup>+</sup> CD8 <sup>+</sup> |                 |                           |                                 |                 |                             |
| Cytokine releasing cells: [2] IL12 <sup>+</sup> , CCL17                                                                                                                                                                                                                                                                                                                                                                                                                                                                                                                                                                                                                                                                                                                                                                                                                     |                 |                           |                                 |                 |                             |
| Co-inhibitory/co-stimulatory receptor: [1] CD137 <sup>+</sup>                                                                                                                                                                                                                                                                                                                                                                                                                                                                                                                                                                                                                                                                                                                                                                                                               |                 |                           |                                 |                 |                             |

**Supplementary Table S9 Bubble Plot Data for NT-P (Outlier 1)**

| <b>Cell Type</b>                         | <b>Percentage Out of Total Cell</b> | <b>Percentage Out of Subcategory</b> | <b>Cell Density</b> |
|------------------------------------------|-------------------------------------|--------------------------------------|---------------------|
| IFN <sup>+</sup> TNF <sup>-</sup> CD4    | 9.042%                              | 58.952%                              | 1497.442            |
| IFN <sup>+</sup> TNF <sup>-</sup> CD8    | 7.395%                              | 56.874%                              | 1224.578            |
| MHC Class I <sup>+</sup> M2              | 4.122%                              | 84.181%                              | 651.595             |
| Th2                                      | 3.569%                              | 21.358%                              | 591.295             |
| IL12 <sup>+</sup> CCL17 <sup>+</sup> DC  | 2.066%                              | 64.717%                              | 349.560             |
| MHC Class I <sup>+</sup> DC              | 1.685%                              | 70.682%                              | 266.289             |
| MHC Class II <sup>+</sup> DC             | 1.560%                              | 65.455%                              | 246.596             |
| IFN <sup>+</sup> TNF <sup>+</sup> CD4    | 1.418%                              | 9.245%                               | 234.828             |
| MHC Class II <sup>+</sup> M2             | 1.267%                              | 25.885%                              | 200.359             |
| IFN <sup>+</sup> TNF <sup>+</sup> CD8    | 0.764%                              | 5.876%                               | 126.510             |
| MHC Class I <sup>+</sup> M1              | 0.710%                              | 83.974%                              | 112.167             |
| Th17                                     | 0.669%                              | 4.001%                               | 110.770             |
| Treg                                     | 0.636%                              | 3.804%                               | 105.310             |
| IFN <sup>-</sup> TNF <sup>+</sup> CD4    | 0.584%                              | 3.809%                               | 96.743              |
| IL12 <sup>+</sup> M1                     | 0.536%                              | 17.181%                              | 90.702              |
| Ki67 <sup>+</sup> CD4                    | 0.424%                              | 2.77%                                | 70.283              |
| CD83 <sup>+</sup> DC                     | 0.341%                              | 14.318%                              | 53.943              |
| Ki67 <sup>+</sup> CD8                    | 0.339%                              | 2.611%                               | 56.226              |
| CD83 <sup>+</sup> M2                     | 0.233%                              | 4.757%                               | 36.818              |
| IFN <sup>-</sup> TNF <sup>+</sup> CD8    | 0.230%                              | 1.767%                               | 38.036              |
| MHC Class II <sup>+</sup> M1             | 0.222%                              | 26.282%                              | 35.106              |
| CD83 <sup>+</sup> M1                     | 0.217%                              | 25.641%                              | 34.249              |
| Th1                                      | 0.075%                              | 0.451%                               | 12.481              |
| IL12 <sup>-</sup> CCL17 <sup>+</sup> DC  | 0.030%                              | 0.943%                               | 5.096               |
| CCL17 <sup>+</sup> M2                    | 0.030%                              | 0.876%                               | 5.096               |
| Ki67 <sup>+</sup> Eomes <sup>+</sup> CD8 | 0.020%                              | 0.154%                               | 3.307               |
| Ki67 <sup>+</sup> Eomes <sup>+</sup> CD4 | 0.010%                              | 0.065%                               | 1.654               |
| IL12 <sup>+</sup> CCL17 <sup>-</sup> DC  | 0.000%                              | 0.000%                               | 0                   |
| PD-L1 <sup>+</sup> M1                    | 0.000%                              | 0.000%                               | 0                   |
| PD-L1 <sup>+</sup> M2                    | 0.000%                              | 0.000%                               | 0                   |

|                                         |        |        |   |
|-----------------------------------------|--------|--------|---|
| PD-L1 <sup>+</sup> DC                   | 0.000% | 0.000% | 0 |
| Ki67 <sup>+</sup> PD-1 <sup>+</sup> CD4 | 0.000% | 0.000% | 0 |
| Ki67 <sup>+</sup> PD-1 <sup>+</sup> CD8 | 0.000% | 0.000% | 0 |

**Supplementary Table S10 Bubble Plot Data for NT-I (Outlier 2)**

| <b>Cell Type</b>                         | <b>Percentage Out of Total Cell</b> | <b>Percentage Out of Subcategory</b> | <b>Cell Density</b> |
|------------------------------------------|-------------------------------------|--------------------------------------|---------------------|
| MHC Class I <sup>+</sup> M2              | 4.688%                              | 99.030%                              | 754.936             |
| CD83 <sup>+</sup> M2                     | 0.637%                              | 13.455%                              | 102.568             |
| Ki67 <sup>+</sup> CD8                    | 0.389%                              | 59.230%                              | 65.823              |
| IL12 <sup>+</sup> M1                     | 0.164%                              | 8.984%                               | 29.827              |
| MHC Class II <sup>+</sup> M2             | 0.143%                              | 3.030%                               | 23.101              |
| Treg                                     | 0.139%                              | 9.292%                               | 22.487              |
| Th1                                      | 0.093%                              | 6.195%                               | 14.991              |
| IFN <sup>+</sup> TNF <sup>-</sup> CD8    | 0.071%                              | 10.769%                              | 11.968              |
| IFN <sup>-</sup> TNF <sup>+</sup> CD8    | 0.066%                              | 10%                                  | 11.113              |
| IFN <sup>+</sup> TNF <sup>-</sup> CD4    | 0.035%                              | 35.000%                              | 5.984               |
| IFN <sup>+</sup> TNF <sup>+</sup> CD8    | 0.020%                              | 3.077%                               | 3.419               |
| CCL17 <sup>+</sup> M2                    | 0.014%                              | 2.941%                               | 2.594               |
| Th2                                      | 0.013%                              | 0.885%                               | 2.142               |
| PD-L1 <sup>+</sup> M2                    | 0.011%                              | 0.242%                               | 1.848               |
| IFN <sup>-</sup> TNF <sup>+</sup> CD4    | 0.010%                              | 10.000%                              | 1.710               |
| Ki67 <sup>+</sup> CD4                    | 0.010%                              | 10.000%                              | 1.710               |
| IFN <sup>+</sup> TNF <sup>+</sup> CD4    | 0.005%                              | 5.000%                               | 0.855               |
| CD83 <sup>+</sup> DC                     | 0%                                  | 0%                                   | 0                   |
| MHC Class II <sup>+</sup> DC             | 0%                                  | 0%                                   | 0                   |
| IL12 <sup>+</sup> CCL17 <sup>-</sup> DC  | 0%                                  | 0%                                   | 0                   |
| IL12 <sup>-</sup> CCL17 <sup>+</sup> DC  | 0%                                  | 0%                                   | 0                   |
| IL12 <sup>+</sup> CCL17 <sup>+</sup> DC  | 0%                                  | 0%                                   | 0                   |
| MHC Class II <sup>+</sup> M1             | 0%                                  | 0%                                   | 0                   |
| Th17                                     | 0%                                  | 0%                                   | 0                   |
| MHC Class I <sup>+</sup> M1              | 0%                                  | 0%                                   | 0                   |
| MHC Class I <sup>+</sup> DC              | 0%                                  | 0%                                   | 0                   |
| PD-L1 <sup>+</sup> DC                    | 0%                                  | 0%                                   | 0                   |
| CD83 <sup>+</sup> M1                     | 0%                                  | 0%                                   | 0                   |
| Ki67 <sup>+</sup> Eomes <sup>+</sup> CD4 | 0%                                  | 0%                                   | 0                   |
| Ki67 <sup>+</sup> PD-1 <sup>+</sup> CD4  | 0%                                  | 0%                                   | 0                   |

|                                          |    |    |   |
|------------------------------------------|----|----|---|
| Ki67 <sup>+</sup> Eomes <sup>+</sup> CD8 | 0% | 0% | 0 |
| Ki67 <sup>+</sup> PD-1 <sup>+</sup> CD8  | 0% | 0% | 0 |
| PD-L1 <sup>+</sup> M1                    | 0% | 0% | 0 |

**Supplementary Table S11 Bubble Plot Data for Cluster 1 (NT)**

| Cell Type                               | Percentage Out of Total Cell | Percentage Out of Subcategory | Cell Density |
|-----------------------------------------|------------------------------|-------------------------------|--------------|
| MHC Class I <sup>+</sup> M2             | 6.172%                       | 94.629%                       | 892.674      |
| CD83 <sup>+</sup> M2                    | 2.529%                       | 32.951%                       | 363.034      |
| Th2                                     | 2.386%                       | 15.051%                       | 278.477      |
| MHC Class I <sup>+</sup> M1             | 2.175%                       | 83.076%                       | 279.648      |
| Th17                                    | 2.174%                       | 14.370%                       | 250.664      |
| MHC Class II <sup>+</sup> M2            | 2.017%                       | 31.575%                       | 275.280      |
| CD83 <sup>+</sup> DC                    | 2.009%                       | 42.051%                       | 246.398      |
| MHC Class I <sup>+</sup> DC             | 1.953%                       | 89.606%                       | 244.027      |
| MHC Class II <sup>+</sup> DC            | 1.909%                       | 41.979%                       | 233.243      |
| IFN <sup>+</sup> TNF <sup>+</sup> CD4   | 1.866%                       | 23.807%                       | 221.011      |
| CD83 <sup>+</sup> M1                    | 1.559%                       | 34.609%                       | 192.445      |
| IFN <sup>+</sup> TNF <sup>-</sup> CD4   | 1.390%                       | 25.936%                       | 165.830      |
| MHC Class II <sup>+</sup> M1            | 1.133%                       | 23.326%                       | 138.207      |
| IFN <sup>-</sup> TNF <sup>+</sup> CD4   | 0.943%                       | 12.647%                       | 111.797      |
| IFN <sup>+</sup> TNF <sup>+</sup> CD8   | 0.915%                       | 13.255%                       | 108.967      |
| IFN <sup>+</sup> TNF <sup>-</sup> CD8   | 0.718%                       | 17.102%                       | 88.481       |
| Treg                                    | 0.665%                       | 11.717%                       | 99.605       |
| IFN <sup>-</sup> TNF <sup>+</sup> CD8   | 0.538%                       | 7.935%                        | 64.446       |
| Ki67 <sup>+</sup> CD8                   | 0.470%                       | 12.827%                       | 57.983       |
| Ki67 <sup>+</sup> CD4                   | 0.457%                       | 9.001%                        | 54.641       |
| Th1                                     | 0.376%                       | 7.149%                        | 62.179       |
| PD-L1 <sup>+</sup> M1                   | 0.332%                       | 13.500%                       | 27.823       |
| PD-L1 <sup>+</sup> M2                   | 0.332%                       | 3.495%                        | 53.205       |
| IL12 <sup>+</sup> CCL17 <sup>+</sup> DC | 0.251%                       | 26.400%                       | 23.847       |
| Ki67 <sup>+</sup> PD-1 <sup>+</sup> CD4 | 0.135%                       | 2.738%                        | 16.198       |
| PD-L1 <sup>+</sup> DC                   | 0.123%                       | 25.307%                       | 20.032       |
| CCL17 <sup>+</sup> M2                   | 0.107%                       | 6.049%                        | 11.906       |
| Ki67 <sup>+</sup> PD-1 <sup>+</sup> CD8 | 0.081%                       | 1.192%                        | 9.503        |
| IL12 <sup>+</sup> M1                    | 0.066%                       | 1.443%                        | 7.646        |

|                                          |        |        |       |
|------------------------------------------|--------|--------|-------|
| Ki67 <sup>+</sup> Eomes <sup>+</sup> CD8 | 0.040% | 1.414% | 5.036 |
| Ki67 <sup>+</sup> Eomes <sup>+</sup> CD4 | 0.023% | 0.318% | 2.693 |
| IL12 <sup>+</sup> CCL17 <sup>-</sup> DC  | 0.010% | 0.939% | 0.975 |
| IL12 <sup>-</sup> CCL17 <sup>+</sup> DC  | 0%     | 0%     | 0     |

**Supplementary Table S12 Bubble Plot Data for Cluster 2 (M)**

| Cell Type                               | Percentage Out of Total Cell | Percentage Out of Subcategory | Cell Density |
|-----------------------------------------|------------------------------|-------------------------------|--------------|
| MHC Class I <sup>+</sup> M2             | 7.356%                       | 90.091%                       | 895.840      |
| MHC Class I <sup>+</sup> M1             | 4.640%                       | 86.123%                       | 574.462      |
| MHC Class I <sup>+</sup> DC             | 3.808%                       | 91.837%                       | 506.950      |
| PD-L1 <sup>+</sup> DC                   | 3.056%                       | 68.798%                       | 385.900      |
| CD83 <sup>+</sup> M1                    | 2.981%                       | 34.861%                       | 341.862      |
| CD83 <sup>+</sup> M2                    | 2.483%                       | 23.334%                       | 291.328      |
| CD83 <sup>+</sup> DC                    | 1.674%                       | 44.601%                       | 198.748      |
| MHC Class II <sup>+</sup> DC            | 1.628%                       | 26.807%                       | 183.623      |
| Th2                                     | 1.537%                       | 71.000%                       | 196.246      |
| MHC Class II <sup>+</sup> M1            | 1.528%                       | 15.192%                       | 171.629      |
| MHC Class II <sup>+</sup> M2            | 1.342%                       | 8.001%                        | 151.117      |
| PD-L1 <sup>+</sup> M1                   | 1.142%                       | 45.758%                       | 179.862      |
| PD-L1 <sup>+</sup> M2                   | 1.142%                       | 30.453%                       | 162.932      |
| Treg                                    | 0.725%                       | 41.885%                       | 103.867      |
| Ki67 <sup>+</sup> CD8                   | 0.553%                       | 11.991%                       | 81.571       |
| IL12 <sup>+</sup> M1                    | 0.238%                       | 2.474%                        | 28.724       |
| CCL17 <sup>+</sup> M2                   | 0.066%                       | 3.689%                        | 8.464        |
| Th1                                     | 0.063%                       | 4.907%                        | 10.768       |
| Th17                                    | 0.039%                       | 1.520%                        | 4.619        |
| IFN <sup>+</sup> TNF <sup>-</sup> CD8   | 0.031%                       | 0.865%                        | 4.616        |
| IFN <sup>+</sup> TNF <sup>-</sup> CD4   | 0.012%                       | 6.481%                        | 1.796        |
| IL12 <sup>+</sup> CCL17 <sup>+</sup> DC | 0.011%                       | 2.203%                        | 1.282        |
| IFN <sup>-</sup> TNF <sup>+</sup> CD8   | 0.007%                       | 33.406%                       | 1.031        |
| IFN <sup>+</sup> TNF <sup>+</sup> CD8   | 0.003%                       | 0.110%                        | 0.512        |
| Ki67 <sup>+</sup> CD4                   | 0.002%                       | 8.333%                        | 0.261        |
| IL12 <sup>+</sup> CCL17 <sup>-</sup> DC | 0%                           | 0%                            | 0            |
| IL12 <sup>-</sup> CCL17 <sup>+</sup> DC | 0%                           | 0%                            | 0            |
| IFN <sup>-</sup> TNF <sup>+</sup> CD4   | 0%                           | 0%                            | 0            |
| IFN <sup>+</sup> TNF <sup>+</sup> CD4   | 0%                           | 0%                            | 0            |

|                                          |    |    |   |
|------------------------------------------|----|----|---|
| Ki67 <sup>+</sup> Eomes <sup>+</sup> CD4 | 0% | 0% | 0 |
| Ki67 <sup>+</sup> PD-1 <sup>+</sup> CD4  | 0% | 0% | 0 |
| Ki67 <sup>+</sup> Eomes <sup>+</sup> CD8 | 0% | 0% | 0 |
| Ki67 <sup>+</sup> PD-1 <sup>+</sup> CD8  | 0% | 0% | 0 |

**Supplementary Table S13 Bubble Plot Data for Cluster 3 (G)**

| <b>Cell Type</b>                         | <b>Percentage Out of Total Cell</b> | <b>Percentage Out of Subcategory</b> | <b>Cell Density</b> |
|------------------------------------------|-------------------------------------|--------------------------------------|---------------------|
| MHC Class I <sup>+</sup> DC              | 10.750%                             | 98.860%                              | 1004.918            |
| MHC Class I <sup>+</sup> M2              | 9.523%                              | 96.458%                              | 1047.144            |
| IFN <sup>+</sup> TNF <sup>-</sup> CD8    | 5.129%                              | 32.782%                              | 613.402             |
| MHC Class II <sup>+</sup> DC             | 4.299%                              | 50.513%                              | 347.225             |
| CD83 <sup>+</sup> DC                     | 3.258%                              | 40.623%                              | 314.512             |
| IFN <sup>+</sup> TNF <sup>-</sup> CD4    | 2.762%                              | 49.013%                              | 347.595             |
| IL12 <sup>+</sup> M1                     | 2.753%                              | 10.768%                              | 236.364             |
| IFN <sup>+</sup> TNF <sup>+</sup> CD8    | 2.688%                              | 19.505%                              | 278.204             |
| CD83 <sup>+</sup> M2                     | 2.659%                              | 26.069%                              | 293.845             |
| MHC Class II <sup>+</sup> M2             | 2.656%                              | 27.855%                              | 284.425             |
| MHC Class I <sup>+</sup> M1              | 1.976%                              | 26.626%                              | 197.119             |
| MHC Class II <sup>+</sup> M1             | 1.750%                              | 15.529%                              | 125.945             |
| CD83 <sup>+</sup> M1                     | 1.630%                              | 22.893%                              | 129.174             |
| IFN <sup>+</sup> TNF <sup>+</sup> CD4    | 1.539%                              | 27.014%                              | 157.156             |
| Ki67 <sup>+</sup> CD8                    | 0.787%                              | 7.269%                               | 96.361              |
| Ki67 <sup>+</sup> CD4                    | 0.701%                              | 11.338%                              | 98.566              |
| Th2                                      | 0.612%                              | 25.406%                              | 79.476              |
| IL12 <sup>+</sup> CCL17 <sup>+</sup> DC  | 0.603%                              | 22.445%                              | 57.091              |
| IFN <sup>-</sup> TNF <sup>+</sup> CD8    | 0.600%                              | 6.331%                               | 81.477              |
| Treg                                     | 0.593%                              | 23.300%                              | 78.581              |
| PD-L1 <sup>+</sup> DC                    | 0.584%                              | 6.576%                               | 66.698              |
| Th17                                     | 0.468%                              | 18.611%                              | 57.281              |
| PD-L1 <sup>+</sup> M1                    | 0.440%                              | 11.498%                              | 93.236              |
| PD-L1 <sup>+</sup> M2                    | 0.440%                              | 3.669%                               | 51.162              |
| CCL17 <sup>+</sup> M2                    | 0.430%                              | 7.018%                               | 37.937              |
| IFN <sup>-</sup> TNF <sup>+</sup> CD4    | 0.147%                              | 1.827%                               | 20.219              |
| Th1                                      | 0.107%                              | 2.623%                               | 15.389              |
| IL12 <sup>-</sup> CCL17 <sup>+</sup> DC  | 0.079%                              | 6.540%                               | 5.534               |
| Ki67 <sup>+</sup> Eomes <sup>+</sup> CD8 | 0.067%                              | 0.462%                               | 9.464               |

|                                          |        |        |       |
|------------------------------------------|--------|--------|-------|
| Ki67 <sup>+</sup> PD-1 <sup>+</sup> CD4  | 0.038% | 0.606% | 5.429 |
| IL12 <sup>+</sup> CCL17 <sup>-</sup> DC  | 0.028% | 4.305% | 3.060 |
| Ki67 <sup>+</sup> Eomes <sup>+</sup> CD4 | 0.024% | 0.412% | 3.493 |
| Ki67 <sup>+</sup> PD-1 <sup>+</sup> CD8  | 0.004% | 0.057% | 0.595 |

**Supplementary Table S14 Mean Range Table for Cluster 1 (NT), Cluster 2(M), Cluster 3 (G)**

| Staining Panel  | Cell Type                                                                                              | Cell Density(cells/mm <sup>2</sup> ) |                           |                           |
|-----------------|--------------------------------------------------------------------------------------------------------|--------------------------------------|---------------------------|---------------------------|
|                 |                                                                                                        | Cluster 1 (NT)<br>(n=3)              | Cluster 2 (M)<br>(n=3)    | Cluster 3<br>(G)<br>(n=4) |
| Oncogenic Panel | PD-1 <sup>+</sup> PD-1 positive cells                                                                  | 638.1<br>(212.8-1349.0)              | 99.6<br>(67.3-146.0)      | 137.7<br>(12.4-300.8)     |
|                 | PD-L1 <sup>+</sup> PD-L1 positive cells                                                                | 2376.6<br>(0-4215.6)                 | 5859.4<br>(4083.6-7815.3) | 2055.1<br>(110.4-3491.1)  |
|                 | IFN <sup>+</sup> IFN releasing cells                                                                   | 1041.7<br>(768.8-1487.1)             | 318.4<br>(32.9-832.6)     | 3277.1<br>(2654.9-4588.5) |
|                 | PD-L1 <sup>+</sup> Pan-CK <sup>+</sup> - Immune suppressive cancer cells                               | 350.6<br>(0-717.3)                   | 3071.2<br>(614.7-5834.7)  | 104.4<br>(0-217.2)        |
|                 | LMP1 <sup>+</sup> Pan-CK <sup>+</sup> - EBV infected cancer cells                                      | 91.0<br>(5.0-153.1)                  | 1172.5<br>(382.6-2530.4)  | 83.8<br>(0-303.5)         |
|                 | LMP1 <sup>+</sup> PD-L1 <sup>+</sup> Pan-CK <sup>+</sup> -Immune suppressive EBV infected cancer cells | 63.3<br>(0-96.8)                     | 968.5<br>(514.9-2041.2)   | 57.4<br>(0-200.3)         |
| Myeloid Panel   | DEC205 <sup>+</sup> Dendritic cells                                                                    | 305.2<br>(12.2-825.4)                | 542.3<br>(80.8-856.7)     | 1007.5<br>(106.7-2219.7)  |
|                 | MHC Class I <sup>+</sup> DEC205 <sup>+</sup> -Antigen presenting dendritic cells                       | 244.0<br>(11.1-643.1)                | 507.0<br>(72.3-596.5)     | 1004.9<br>(103.9-2219.7)  |
|                 | MHC Class II <sup>+</sup> DEC205 <sup>+</sup> -Antigen presenting dendritic cells                      | 233.2<br>(3.3-684.1)                 | 183.6<br>(0.8-538.4)      | 347.2<br>(86.1-720.7)     |
|                 | PD-L1 <sup>+</sup> DEC205 <sup>+</sup> - Immune suppressive dendritic cells                            | 20.0<br>(0-59.0)                     | 385.9<br>(46.9-657.9)     | 66.7<br>(0-177.1)         |
|                 | CD83 <sup>+</sup> DEC205 <sup>+</sup> - Activated dendritic cells                                      | 246.4<br>(1.1-714.3)                 | 198.7<br>(45.4-469.8)     | 314.5<br>(83.1-747.1)     |
|                 | CD68 <sup>+</sup> CD163 <sup>-</sup> - M1 cells                                                        | 345.3<br>(187.8-633.4)               | 637.1<br>(364.6-1142.2)   | 873.7<br>(432.4-1522.4)   |
|                 | MHC Class I <sup>+</sup> CD68 <sup>+</sup> CD163 <sup>-</sup> - Antigen presenting M1 cells            | 279.6<br>(140.1-489.9)               | 574.5<br>(272.1-1108.3)   | 197.1<br>(107.6-329.6)    |
|                 | MHC Class II <sup>+</sup> CD68 <sup>+</sup> CD163 <sup>-</sup> - Antigen presenting M1 cells           | 138.2<br>(6.7-401.4)                 | 171.6<br>(0-511.8)        | 125.9<br>(35.4-293.4)     |
|                 | PD-L1 <sup>+</sup> CD68 <sup>+</sup> CD163 <sup>-</sup> -Immune suppressive M1 cells                   | 27.8<br>(0-59.0)                     | 179.9<br>(22.6-276.9)     | 93.2<br>(1.9-187.9)       |
|                 | CD83 <sup>+</sup> CD68 <sup>+</sup> CD163 <sup>-</sup> -Activated M1 cells                             | 192.4<br>(5.6-537.4)                 | 341.9<br>(39.2-939.6)     | 129.2<br>(26.2-312.6)     |
|                 | CD163 <sup>+</sup> M2 cells                                                                            | 977.8<br>(242.3-1944.3)              | 965.0<br>(254.6-1984.9)   | 1074.3<br>(478.3-2241.3)  |
|                 | MHC Class I <sup>+</sup> CD163 <sup>+</sup> - Antigen presenting M2 cells                              | 892.7<br>(239.0-1713.9)              | 895.8<br>(214.6-1871.9)   | 1047.1<br>(444.6-2239.8)  |
|                 | MHC Class II <sup>+</sup> CD163 <sup>+</sup> -Antigen presenting M2 cells                              | 275.3<br>(50.0-414.3)                | 151.1<br>(1.5-445.6)      | 284.4<br>(72.1-511.4)     |
|                 | PD-L1 <sup>+</sup> CD163 <sup>+</sup> - Suppressive M2 cells                                           | 53.2<br>(5.6-150.8)                  | 162.9<br>(88.8-292.3)     | 51.2<br>(0-144.8)         |
|                 | CD83 <sup>+</sup> CD163 <sup>+</sup> - Activated M2 cells                                              | 363.0<br>(24.5-652.5)                | 291.3<br>(45.4-726.5)     | 293.8<br>(101.1-668.5)    |
|                 | CD4 <sup>+</sup> T helper cells                                                                        | 965.0                                | 136.2                     | 569.4                     |

|                               |                                                                                                       |                              |                              |                            |
|-------------------------------|-------------------------------------------------------------------------------------------------------|------------------------------|------------------------------|----------------------------|
| Lymphoid and Functional Panel |                                                                                                       | (415.0-1987.8)               | (109.2-161.3)                | (52.4-1289.9)              |
|                               | T-bet <sup>+</sup> CD4 <sup>+</sup> -Th1                                                              | 62.2<br>(4.2-122.8)          | 10.8<br>(0.77-30.0)          | 15.4<br>(0-40.4)           |
|                               | GATA3 <sup>+</sup> CD4 <sup>+</sup> -Th2                                                              | 278.5<br>(19.6-785.9)        | 196.2<br>(53.1-309.6)        | 79.4<br>(7.0-168.2)        |
|                               | ROR T <sup>+</sup> CD4 <sup>+</sup> -Th17                                                             | 250.7<br>(0-710.5)           | 4.6<br>(0-11.6)              | 57.3<br>(12.1-146.0)       |
|                               | FOXP3 <sup>+</sup> CD4 <sup>+</sup> -Treg                                                             | 99.6<br>(24.9-152.2)         | 103.9<br>(74.6-140.7)        | 78.6<br>(7.0-244.1)        |
|                               | Ki67 <sup>+</sup> CD4 <sup>+</sup> -Proliferating T helper cells                                      | 54.6<br>(17.5-93.2)          | 0.3<br>(0-0.8)               | 98.6<br>(0-281.0)          |
|                               | Ki67 <sup>+</sup> PD-1 <sup>+</sup> CD4 <sup>+</sup> -Proliferating suppressive T helper cells        | 16.2<br>(5.6-28.3)           | 0<br>(0-0)                   | 5.4<br>(0-16.2)            |
|                               | Ki67 <sup>+</sup> Eomes <sup>+</sup> CD4 <sup>+</sup> - Proliferating Eomes expressing T helper cells | 2.7<br>(0-7.5)               | 0<br>(0-0)                   | 3.5<br>(0-10.0)            |
|                               | IFN <sup>+</sup> TNF CD4 <sup>+</sup> - IFN releasing T helper cells                                  | 165.8<br>(51.3-319.7)        | 1.8<br>(0-5.4)               | 347.6<br>(51.8-1045.4)     |
|                               | IFN <sup>-</sup> TNF CD4 <sup>+</sup> - TNF T releasing helper cells                                  | 111.8<br>(11.9-224.3)        | 0<br>(0-0)                   | 20.2<br>(0-64.7)           |
|                               | IFN <sup>+</sup> TNF CD4 <sup>+</sup> - IFN and TNF releasing T helper cells                          | 221.0<br>(10.0-386.8)        | 0<br>(0-0)                   | 157.2<br>(2.9-446.7)       |
|                               | CD8 <sup>+</sup> - CD8 positive T cells                                                               | 1453.3<br>(1299.3-1604.6)    | 982.0<br>(360.7-1471.7)      | 1644.1<br>(909.1-2575.3)   |
|                               | Ki67 <sup>+</sup> CD8 <sup>+</sup> - Proliferating CD8 positive T cells                               | 58.0<br>(37.9-68.2)          | 81.6<br>(0-137.0)            | 96.4<br>(27.4-191.8)       |
|                               | Ki67 <sup>+</sup> PD-1 <sup>+</sup> CD8 <sup>+</sup> - Proliferating suppressive CD8 positive T cells | 9.5<br>(0-23.6)              | 0<br>(0-0)                   | 0.6<br>(0-2.4)             |
|                               | Ki67 <sup>+</sup> Eomes <sup>+</sup> CD8 <sup>+</sup> - Proliferating CD8 positive memory T cells     | 5.0<br>(2.0-9.4)             | 0<br>(0-0)                   | 9.5<br>(0-33.1)            |
|                               | IFN <sup>+</sup> TNF CD8 <sup>+</sup> - IFN releasing CD8 positive T cells (non-TNF releasing)        | 88.5<br>(25.3-154.4)         | 4.6<br>(0-10.8)              | 613.4<br>(98.7-1647.4)     |
|                               | IFN <sup>-</sup> TNF CD8 <sup>+</sup> - TNF releasing CD8 positive T cells (non- IFN releasing)       | 64.4<br>(11.3-141.1)         | 1.0<br>(0-2.3)               | 81.5<br>(5.9-202.1)        |
|                               | IFN <sup>+</sup> TNF CD8 <sup>+</sup> - IFN and TNF CD8 positive T cells                              | 109.0<br>(10.6-184.3)        | 0.5<br>(0-1.5)               | 278.2<br>(15.6-721.3)      |
|                               | IFN <sup>+</sup> TNF - IFN releasing cells (non-TNF releasing)                                        | 935.2<br>(442.7-1569.6)      | 378.6<br>(79.3-822.6)        | 2820.1<br>(852.3-5989.8)   |
|                               | IFN <sup>-</sup> TNF - TNF releasing cells (non- IFN releasing)                                       | 663.6<br>(294.7-904.8)       | 227.6<br>(104.7-448.9)       | 1059.8<br>(58.0-1694.3)    |
|                               | IFN <sup>+</sup> TNF - IFN and TNF releasing cells                                                    | 457.8<br>(105.7-728.7)       | 82.4<br>(30.8-142.6)         | 1315.2<br>(734.0-2371.9)   |
|                               | IFN <sup>-</sup> TNF - Non-IFN and non-TNF releasing cells                                            | 10255.4<br>(96252.3-11265.2) | 14404.5<br>(14338.6-14484.0) | 5636.2<br>(2725.9-10725.0) |
|                               | PD-1 <sup>+</sup> - PD-1 positive cells                                                               | 350.8<br>(292.1-401.7)       | 16.2<br>(9.2-27.7)           | 76.4<br>(2.0-220.4)        |
| Refinement Molecular Panel    | IL12 <sup>+</sup> - IL12 releasing cells                                                              | 203.2<br>(68.2-389.4)        | 308.3<br>(33.0-513.3)        | 1032.0<br>(295.8-2130.2)   |
|                               | IL12 <sup>+</sup> CD68 <sup>+</sup> CD163 <sup>-</sup> - IL12 releasing M1 cells                      | 7.6<br>(1.5-9.7)             | 28.7<br>(6.9-52.3)           | 236.4<br>(13.5-621.6)      |

|  |                                                                                                                        |                        |                       |                        |
|--|------------------------------------------------------------------------------------------------------------------------|------------------------|-----------------------|------------------------|
|  | IL12 <sup>+</sup> CCL17 <sup>-</sup> DEC205 <sup>+</sup> - IL12 releasing dendritic cells                              | 23.8<br>(1.9-67.2)     | 1.3<br>(0-2.3)        | 57.1<br>(3.9-173.1)    |
|  | CCL17 <sup>+</sup> - CCL17 releasing cells                                                                             | 355.2<br>(114.0-739.0) | 279.8<br>(27.7-437.1) | 461.8<br>(18.0-855.5)  |
|  | CCL17 <sup>+</sup> CD163 <sup>+</sup> - CCL17 releasing M2 cells                                                       | 11.9<br>(8.8-15.2)     | 8.5<br>(3.1-15.4)     | 37.9<br>(0.9-77.7)     |
|  | IL12 <sup>-</sup> CCL17 <sup>+</sup> DEC205 <sup>+</sup> -CCL17 releasing dendritic cells                              | 1.0<br>(0-2.9)         | 0<br>(0-0)            | 3.1<br>(0-4.6)         |
|  | IL12 <sup>+</sup> CCL17 <sup>+</sup> DEC205 <sup>+</sup> - IL12 and CCL17 releasing dendritic cells                    | 0<br>(0-0)             | 0<br>(0-0)            | 5.5<br>(0-9.0)         |
|  | CD137 <sup>-</sup> Immune activation marker                                                                            | 134.4<br>(6.8-212.3)   | 44.9<br>(0-81.6)      | 390.7<br>(199.2-800.3) |
|  | CD137 <sup>+</sup> CD68 <sup>+</sup> CD163 <sup>-</sup> - CD137 positive M1 cells                                      | 15.7<br>(0-45.7)       | 1.5<br>(0-3.8)        | 31.0<br>(4.7-87.4)     |
|  | CD137 <sup>+</sup> IL12 <sup>+</sup> CD68 <sup>+</sup> CD163 <sup>-</sup> - CD137 positive IL12 releasing M1 cells     | 0<br>(0-0)             | 0.3<br>(0-0.8)        | 6.6<br>(0.9-14.0)      |
|  | CD137 <sup>+</sup> IL12 <sup>-</sup> CD68 <sup>+</sup> CD163 <sup>-</sup> - CD137 positive non-IL12 releasing M1 cells | 15.7<br>(0-45.7)       | 1.2<br>(0-3.1)        | 24.4<br>(2.3-73.4)     |
|  | CD137 <sup>+</sup> CD163 <sup>+</sup> - CD137 positive M2 cells                                                        | 50.3<br>(2.9-143.3)    | 20.0<br>(0-60.0)      | 107.2<br>(18.0-223.4)  |
|  | CD137 <sup>+</sup> CCL17 <sup>+</sup> CD163 <sup>+</sup> -CD137 positive CCL17 releasing M2 cells                      | 2.2<br>(1.0-4.4)       | 0<br>(0-0)            | 7.9<br>(0.9-21.1)      |
|  | CD137 <sup>+</sup> CCL17 <sup>-</sup> CD163 <sup>+</sup> -CD137 positive non-CCL17 releasing M2 cells                  | 48.1<br>(1.9-138.9)    | 20.0<br>(0-60.0)      | 99.3<br>(13.3-215.2)   |
|  | CD137 <sup>+</sup> CD8 <sup>+</sup> - CD137 positive CD8 positive T cells                                              | 15.9<br>(2.9-36.5)     | 6.7<br>(0-18.5)       | 78.5<br>(43.0-98.9)    |
|  | CD137 <sup>+</sup> IFN $\gamma$ CD8 <sup>+</sup> - CD137 positive IFN $\gamma$ releasing CD8 positive T cells          | 10.5<br>(2.3-26.3)     | 0<br>(0-0)            | 20.0<br>(1.2-59.4)     |
|  | CD137 <sup>+</sup> IFN $\gamma$ CD8 <sup>+</sup> - CD137 positive non-IFN $\gamma$ releasing CD8 positive T cells      | 5.4<br>(0-10.2)        | 6.7<br>(0-18.5)       | 58.5<br>(19.8-97.7)    |
|  | CD137 <sup>+</sup> DEC205 <sup>+</sup> - CD137 positive dendritic cells                                                | 15.6<br>(1.0-42.4)     | 0<br>(0-0)            | 16.7<br>(4.7-43.0)     |

**Supplementary Table S15 Mean Range Table for Outlier 1 (NT-P) and Outlier 2 (NT-I)**

| Staining Panel                | Cell Type                                                                                              | Cell Density(cells/mm <sup>2</sup> ) |                           |
|-------------------------------|--------------------------------------------------------------------------------------------------------|--------------------------------------|---------------------------|
|                               |                                                                                                        | Outlier 2 (NT-I)<br>(n=1)            | Outlier 1 (NT-P)<br>(n=1) |
| Oncogenic Panel               | PD-1 <sup>+</sup> PD-1 positive cells                                                                  | 202.9                                | 61.8                      |
|                               | PD-L1 <sup>+</sup> PD-L1 positive cells                                                                | 789.6                                | 5.7                       |
|                               | IFN <sup>+</sup> IFN releasing cells                                                                   | 918.0                                | 2718.7                    |
|                               | PD-L1 <sup>+</sup> Pan-CK <sup>+</sup> - Immune suppressive cancer cells                               | 207.6                                | 0                         |
|                               | LMP1 <sup>+</sup> Pan-CK <sup>+</sup> - EBV infected cancer cells                                      | 169.2                                | 365.2                     |
|                               | LMP1 <sup>+</sup> PD-L1 <sup>+</sup> Pan-CK <sup>+</sup> -Immune suppressive EBV infected cancer cells | 158.2                                | 0                         |
| Myeloid Panel                 | DEC205 <sup>+</sup> Dendritic cells                                                                    | 0                                    | 376.7                     |
|                               | MHC Class I <sup>+</sup> DEC205 <sup>+</sup> -Antigen presenting dendritic cells                       | 0                                    | 266.3                     |
|                               | MHC Class II <sup>+</sup> DEC205 <sup>+</sup> -Antigen presenting dendritic cells                      | 0                                    | 246.6                     |
|                               | PD-L1 <sup>+</sup> DEC205 <sup>+</sup> - Immune suppressive dendritic cells                            | 0                                    | 0                         |
|                               | CD83 <sup>+</sup> DEC205 <sup>+</sup> -Activated dendritic cells                                       | 0                                    | 53.9                      |
|                               | CD68 <sup>+</sup> CD163 <sup>-</sup> -M1 cells                                                         | 0                                    | 133.6                     |
|                               | MHC Class I <sup>+</sup> CD68 <sup>+</sup> CD163 <sup>-</sup> -Antigen presenting M1 cells             | 0                                    | 112.2                     |
|                               | MHC Class II <sup>+</sup> CD68 <sup>+</sup> CD163 <sup>-</sup> -Antigen presenting M1 cells            | 0                                    | 35.1                      |
|                               | PD-L1 <sup>+</sup> CD68 <sup>+</sup> CD163 <sup>-</sup> -Immune suppressive M1 cells                   | 0                                    | 0                         |
|                               | CD83 <sup>+</sup> CD68 <sup>+</sup> CD163 <sup>-</sup> -Activated M1 cells                             | 0                                    | 34.2                      |
|                               | CD163 <sup>+</sup> - M2 cells                                                                          | 762.3                                | 774.0                     |
|                               | MHC Class I <sup>+</sup> CD163 <sup>+</sup> -Antigen presenting M2 cells                               | 754.9                                | 651.6                     |
|                               | MHC Class II <sup>+</sup> CD163 <sup>+</sup> -Antigen presenting M2 cells                              | 23.1                                 | 200.4                     |
|                               | PD-L1 <sup>+</sup> CD163 <sup>+</sup> -Suppressive M2 cells                                            | 1.8                                  | 0                         |
|                               | CD83 <sup>+</sup> CD163 <sup>+</sup> - Activated M2 cells                                              | 102.6                                | 36.8                      |
| Lymphoid and Functional Panel | CD4 <sup>+</sup> T helper cells                                                                        | 129.5                                | 2654.3                    |
|                               | T-bet <sup>+</sup> CD4 <sup>+</sup> -Th1                                                               | 15.0                                 | 12.5                      |
|                               | GATA3 <sup>+</sup> CD4 <sup>+</sup> -Th2                                                               | 2.1                                  | 591.2                     |
|                               | ROR T <sup>+</sup> CD4 <sup>+</sup> -Th17                                                              | 0                                    | 110.8                     |
|                               | FOXP3 <sup>+</sup> CD4 <sup>+</sup> -Treg                                                              | 22.5                                 | 105.3                     |
|                               | Ki67 <sup>+</sup> CD4 <sup>+</sup> - Proliferating T helper cells                                      | 1.7                                  | 70.3                      |
|                               | Ki67 <sup>+</sup> PD-1 <sup>+</sup> CD4 <sup>+</sup> - Proliferating suppressive T helper cells        | 0                                    | 0                         |

|                            |                                                                                                                          |         |         |
|----------------------------|--------------------------------------------------------------------------------------------------------------------------|---------|---------|
|                            | Ki67 <sup>+</sup> Eomes <sup>+</sup> CD4 <sup>+</sup> - Proliferating Eomes expressing T helper cells                    | 0       | 1.7     |
|                            | IFN $\gamma$ + TNF $\alpha$ CD4 <sup>+</sup> - IFN $\gamma$ releasing T helper cells                                     | 6.0     | 1497.4  |
|                            | IFN $\gamma$ - TNF $\alpha$ CD4 <sup>+</sup> - TNF $\alpha$ T releasing helper cells                                     | 1.7     | 96.7    |
|                            | IFN $\gamma$ + TNF $\alpha$ CD4 <sup>+</sup> - IFN $\gamma$ and TNF $\alpha$ releasing T helper cells                    | 0.9     | 234.8   |
|                            | CD8 <sup>+</sup> - CD8 positive T cells                                                                                  | 528.9   | 5908.3  |
|                            | Ki67 <sup>+</sup> CD8 <sup>+</sup> - Proliferating CD8 positive T cells                                                  | 65.8    | 56.2    |
|                            | Ki67 <sup>+</sup> PD-1 <sup>+</sup> CD8 <sup>+</sup> - Proliferating suppressive CD8 positive T cells                    | 0       | 0       |
|                            | Ki67 <sup>+</sup> Eomes <sup>+</sup> CD8 <sup>+</sup> - Proliferating CD8 positive memory T cells                        | 0.9     | 3.3     |
|                            | IFN $\gamma$ + TNF $\alpha$ CD8 <sup>+</sup> - IFN $\gamma$ releasing CD8 positive T cells (non-TNF $\alpha$ releasing)  | 12.0    | 1224.6  |
|                            | IFN $\gamma$ - TNF $\alpha$ CD8 <sup>+</sup> - TNF $\alpha$ releasing CD8 positive T cells (non- IFN $\gamma$ releasing) | 11.1    | 38.0    |
|                            | IFN $\gamma$ + TNF $\alpha$ CD8 <sup>+</sup> - IFN $\gamma$ and TNF $\alpha$ CD8 positive T cells                        | 3.4     | 126.5   |
|                            | IFN $\gamma$ + TNF $\alpha$ - IFN $\gamma$ releasing cells (non-TNF $\alpha$ releasing)                                  | 590.7   | 4129.3  |
|                            | IFN $\gamma$ - TNF $\alpha$ - TNF $\alpha$ releasing cells (non- IFN $\gamma$ releasing)                                 | 417.2   | 913.7   |
|                            | IFN $\gamma$ + TNF $\alpha$ - IFN $\gamma$ and TNF $\alpha$ releasing cells                                              | 23.9    | 504.4   |
|                            | IFN $\gamma$ - TNF $\alpha$ - Non-IFN $\gamma$ and non-TNF $\alpha$ releasing cells                                      | 15871.8 | 11012.9 |
|                            | PD-1 <sup>+</sup> - Immune suppressive cells                                                                             | 62.4    | 41.3    |
| Refinement Molecular Panel | IL12 <sup>+</sup> -IL12 releasing cells                                                                                  | 439.6   | 4194.7  |
|                            | IL12 <sup>+</sup> CD68 <sup>+</sup> CD163 <sup>-</sup> - IL12 releasing M1 cells                                         | 29.8    | 90.7    |
|                            | IL12 <sup>+</sup> CCL17 <sup>-</sup> DEC205 <sup>+</sup> - IL12 releasing dendritic cells                                | 0       | 349.6   |
|                            | CCL17 <sup>+</sup> - CCL17 releasing cells                                                                               | 373.5   | 143.7   |
|                            | CCL17 <sup>+</sup> CD163 <sup>+</sup> - CCL17 releasing M2 cells                                                         | 2.6     | 5.1     |
|                            | IL12 <sup>-</sup> CCL17 <sup>+</sup> DEC205 <sup>+</sup> -CCL17 releasing dendritic cells                                | 0       | 0       |
|                            | IL12 <sup>+</sup> CCL17 <sup>+</sup> DEC205 <sup>+</sup> - IL12 and CCL17 releasing dendritic cells                      | 0       | 5.1     |
|                            | CD137 <sup>+</sup> - Immune activation marker                                                                            | 199.7   | 18.3    |
|                            | CD137 <sup>+</sup> CD68 <sup>+</sup> CD163 <sup>-</sup> - CD137 positive M1 cells                                        | 9.1     | 3.1     |
|                            | CD137 <sup>+</sup> IL12 <sup>+</sup> CD68 <sup>+</sup> CD163 <sup>-</sup> -CD137 positive IL12 releasing M1 cells        | 0       | 0       |
|                            | CD137 <sup>+</sup> IL12 <sup>-</sup> CD68 <sup>+</sup> CD163 <sup>-</sup> -CD137 positive non-IL12 releasing M1 cells    | 9.1     | 3.1     |

|  |                                                                                                              |     |     |
|--|--------------------------------------------------------------------------------------------------------------|-----|-----|
|  | CD137 <sup>+</sup> CD163 <sup>+</sup> - CD137 positive M2 cells                                              | 0   | 7.1 |
|  | CD137 <sup>+</sup> CCL17 <sup>+</sup> CD163 <sup>+</sup> -CD137 positive CCL17 releasing M2 cells            | 0   | 0   |
|  | CD137 <sup>+</sup> CCL17 <sup>-</sup> CD163 <sup>+</sup> -CD137 positive non-CCL17 releasing M2 cells        | 0   | 7.1 |
|  | CD137 <sup>+</sup> CD8 <sup>+</sup> - CD137 positive CD8 positive T cells                                    | 6.5 | 3.1 |
|  | CD137 <sup>+</sup> IFN <sup>+</sup> CD8 <sup>+</sup> - CD137 positive IFN releasing CD8 positive T cells     | 0   | 1.0 |
|  | CD137 <sup>+</sup> IFN <sup>-</sup> CD8 <sup>+</sup> - CD137 positive non-IFN releasing CD8 positive T cells | 6.5 | 2.1 |
|  | CD137 <sup>+</sup> DEC205 <sup>+</sup> - CD137 positive dendritic cells                                      | 0   | 2.0 |

**Supplementary Table S16 R Package**

| <b>R analysis</b>                                              | <b>Library</b>                         |
|----------------------------------------------------------------|----------------------------------------|
| Bar Chart, Box Plot, Dot Plot (Monomarker)                     | ggplot2, ggpubr, dplyr, rstatix        |
| Bubble Plot, Line Dot Plot, Dot Plot (Cell Type),<br>Histogram | ggplot2                                |
| Distance analysis                                              | stingr, phenoptr, dplyr                |
| Eclipse Correlation                                            | ggcorrplot2, plyr, rstatix, ggplot2    |
| Genetic Analysis                                               | GEOquery, limma, tidyverse, data.table |
| Radar Chart                                                    | Fmsb                                   |
| Rose Plot                                                      | ggpubr, ggplot2                        |
| Scatter Pie Chart                                              | ggplot2, scatterpie                    |
| t-SNE                                                          | Rtsne, ggplot2, caret                  |
| Network Analysis                                               | network, sna, ggplot 2, GGally         |
| Circus Plot                                                    | Tidyverse, circlize, graphics          |
